## RUNNING TITLE: COVID-19 VACCINE UPTAKE

### Title page

**Title:** Predictors of COVID-19 vaccine uptake: An online longitudinal study of US Veterans and non-Veterans

**Authors:** Alistair Thorpe, PhD<sup>1</sup>, Angela Fagerlin, PhD<sup>1,2</sup>, Frank A. Drews, PhD<sup>2,3</sup>, Holly Shoemaker, MPH<sup>1,2</sup>, Federica S. Brecha, BS<sup>1</sup>, and Laura D. Scherer, PhD<sup>4,5</sup>

**Affiliations:** (1) Spencer Fox Eccles School of Medicine at University of Utah, Salt Lake City, UT. (2) Salt Lake City VA Informatics Decision-Enhancement and Analytic Sciences (IDEAS) Center for Innovation, Salt Lake City, UT. (3) University of Utah College of Social and Behavioral Science, Salt Lake City, UT. (4) Division of Cardiology, University of Colorado, School of Medicine, Aurora, CO. (5) Denver VA Center of Innovation.

**Corresponding author:** Alistair Thorpe, PhD, [alistair.thorpe@hsc.utah.edu] Spencer Fox Eccles School of Medicine at University of Utah, Salt Lake City, UT.

#### **Author contributions:**

*Concept and design:* Thorpe, Scherer, Drews, Fagerlin.

*Acquisition, analysis, or interpretation of data:* Thorpe, Scherer, Shoemaker, Fagerlin.

*Drafting of the manuscript:* Thorpe.

*Critical revision of the manuscript for important intellectual content:* All authors.

*Statistical analysis:* Thorpe.

*Supervision:* Scherer, Fagerlin.

**RUNNING TITLE: COVID-19 VACCINE UPTAKE**

**Acknowledgements:** The pre-registration document associated with this manuscript is available at: [https://aspredicted.org/MKS\\_HRZ](https://aspredicted.org/MKS_HRZ). The views expressed in this paper are those of the authors and do not necessarily represent the position or policy of the U.S. Department of Veterans Affairs or the United States Government.

**Conflicts of interest:** The authors declare that they have no known competing financial interests or personal relationships that could have appeared to influence the work reported in this paper.

**Financial disclosure:** Dr Thorpe was supported by grant No. 51300302 from the American Heart Association Children’s Strategically Focused Research Network fellowship. Funding for the study was provided by the VA (VA C-19-20-205; for recruitment of Veterans) to Drs. Fagerlin & Scherer and Dr. Fagerlin’s Jon M. Huntsman Presidential Endowed Chair (for recruitment of non-Veterans).

**Word count:** 2427

## RUNNING TITLE: COVID-19 VACCINE UPTAKE

### Abstract

#### Abstract

**Background.** To effectively promote vaccine uptake, it is important to understand which people are most and least inclined to be vaccinated and why. **Purpose.** To identify predictors of COVID-19 vaccine uptake and reasons for non-vaccination. **Design.** A longitudinal English-language survey study. **Setting.** Online in December-2020, January-2021, and March-2021. **Participants.** 930 US respondents (63% Veterans). **Measurements.** Surveys included questions about respondents' behaviors, well-being, healthcare experiences, and attitudes regarding the pandemic. **Results.** The proportion of respondents who received  $\geq 1$ -dose of a COVID-19 vaccine increased from 18% in January to 67% in March. Older age predicted vaccine uptake in January (OR=2.02[95% CI=1.14–3.78],  $p < .001$ ) and March (10.92[6.76–18.05],  $p < .001$ ). In January, additional predictors of vaccine uptake were higher numeracy (1.48[1.20–1.86],  $p < .001$ ), COVID-19 risk perceptions (1.35[1.03–1.78],  $p = .029$ ), and believing it is important that adults get the COVID-19 vaccine (1.66[1.05–2.66],  $p = .033$ ). In March, additional predictors of vaccine uptake were believing it is important that adults get the COVID-19 vaccine (1.63[1.15–2.34],  $p = .006$ ), previous (January) COVID-19 vaccine intentions (1.37[1.10–1.72],  $p = .006$ ), and belief in science (0.84[0.72–0.99],  $p = .041$ ). Concerns about side effects and the vaccine development process were the most common reasons for non-vaccination. Unvaccinated respondents with no interest in getting a COVID-19 vaccine were younger (0.27[0.09–0.77],  $p = .016$ ), held negative views about COVID-19 vaccines for adults (0.15[0.08–0.26],  $p < .001$ ), had lower trust in healthcare (0.59[0.36–0.95],  $p = .032$ ), and preferred to watch and wait in clinically ambiguous medical situations (0.66[0.48–0.89],  $p = .007$ ). **Limitations.** Reliance on the accuracy and consistency of self-reported data. **Conclusion.** These findings offer important insights regarding key predictors of vaccine uptake during the early stages of the COVID-19 vaccine rollout in the US, which can help guide health communications and public outreach. Evidence that attitudes and intentions towards COVID-19 vaccines are important predictors of uptake provides validation for studies which have used these measures and reinforces the need to develop effective strategies for addressing concerns about vaccine safety and development which continue to be at the forefront of vaccine hesitancy. **Key words:** COVID-19, Vaccine hesitancy, Vaccine uptake, longitudinal survey

**Registration:** The pre-registration document associated with this manuscript is available at:

[https://aspredicted.org/MKS\\_HRZ](https://aspredicted.org/MKS_HRZ).

## RUNNING TITLE: COVID-19 VACCINE UPTAKE

### Introduction

COVID-19 continues to pose a significant threat to public health. Widespread uptake of the multiple vaccines authorized by the U.S. Food and Drug Administration for use against COVID-19 represents the safest and most effective strategy for limiting the impact of the disease.<sup>1</sup> However, public hesitancy and refusal to get vaccinated remains a major challenge to realizing the full preventative health benefits of the authorized COVID-19 vaccines.<sup>2</sup>

In order to effectively promote vaccine uptake, it is important to first understand which people are most and least inclined to be vaccinated and why. Over the course of the pandemic, research identifying important demographic (e.g., age, race, ethnicity, and education)<sup>2-5</sup> and psychological factors (e.g., COVID-19 risk perceptions,<sup>3,4,6,7</sup> belief in conspiracy theories,<sup>8</sup> political affiliation,<sup>3,6,7,9</sup> exposure to misinformation,<sup>10</sup> and trust in scientists,<sup>6,11</sup> and the government<sup>11,12</sup>) associated with public attitudes and intentions towards COVID-19 vaccines has accumulated at a rapid rate. This research has been of great value to policy makers and health communicators aiming to develop strategies and interventions to address concerns about COVID-19 vaccines and promote vaccine uptake.

However, while attitudes and intentions towards vaccination are often useful predictors of behavior<sup>13-15</sup> they do not always translate into actual vaccine uptake.<sup>16-20</sup> For example, it is well documented that many people who intend to receive an influenza vaccine ultimately do not go on to receive one.<sup>16,18</sup> Longitudinal data is therefore needed to identify attitudinal and sociodemographic factors that predict future vaccine uptake. The aim of the present study is to identify factors that predicted uptake of COVID-19 vaccination when vaccines first became

## RUNNING TITLE: COVID-19 VACCINE UPTAKE

available in January and March-2021, and to report the reasons given for not getting vaccinated by those who had not and did not intend to, following the rollout of the COVID-19 vaccines in the US in December-2020.

We expected that older age, living in a state with a greater proportion of people vaccinated, Veteran status, having a greater number of pre-existing health conditions, higher health literacy, higher numeracy,<sup>a</sup> and being non-Hispanic white, would be associated with having received at least one dose of a COVID-19 vaccine in both January and March-2021. Based on existing research on psychological factors associated with COVID-19 vaccine attitudes and intentions, we also expected that greater worry about COVID-19, greater COVID-19 risk perceptions, greater confidence in vaccines, greater intentions to get a COVID-19 vaccine, greater trust in health care, greater belief in science, less belief in conspiracies, more liberal political views, and medical maximizing would be associated with COVID-19 vaccine uptake.

## Method

**Recruitment and respondents.** Respondents were recruited and compensated by Qualtrics Online Panels for three surveys as part of a longitudinal study conducted in December 2-27, 2020 ( $n_{\text{Veteran}}=1060$ ;  $n_{\text{nonVeteran}}=1025$ ), January 21-February 6, 2021 ( $n_{\text{Veteran}}=746$ ;  $n_{\text{nonVeteran}}=511$ ), and March 8-23, 2021 ( $n_{\text{Veteran}}=688$ ;  $n_{\text{nonVeteran}}=387$ ). The surveys were in presented in English and administered online. This study was deemed exempt by the University of Utah and the Salt

---

<sup>a</sup> In our pre-registration ([https://aspredicted.org/MKS\\_HRZ](https://aspredicted.org/MKS_HRZ)) we erroneously stated that we would expect “lower health literacy, lower numeracy” to be associated with vaccine uptake. This was an error and is therefore corrected in the manuscript.

## RUNNING TITLE: COVID-19 VACCINE UPTAKE

Lake City VA IRBs and follows the reporting guidelines of the American Association for Public Opinion Research.

A total of 930 respondents completed all three surveys and were included in the analyses.

Information on the 1,155 respondents who did not complete all three surveys is available at:

[https://rpubs.com/AThorpe/CV19VA\\_Dropouts](https://rpubs.com/AThorpe/CV19VA_Dropouts). The completion rate was 44% overall, 55% for Veterans, and 33% for non-Veterans. Respondents in our sample were generally older (median age ranged between 55 and 74 years old), male (735 (79%)), non-Hispanic White (720 (77%)), US Veterans (584 (63%)), and with a median household income between \$50,000-\$99,999. Over half of respondents (440 (64%)) reported having a pre-existing condition that made them more vulnerable to COVID-19; 186 respondents (27%) indicated that they did not have such a pre-existing condition and 67 respondents (10%) were not sure. In January, 165 respondents (18%) reported having received a COVID-19 vaccine; 160 (97%) of those were first doses and only 5 (3%) had received both doses. The number of respondents reported having been vaccinated increased to 620 (67%) in March with 206 (33%) first doses and 414 (67%) both doses. Full demographics are shown in Table 1.

**Procedure and measures.** Over a four-month period (December-2020 to March-2021), respondents completed three surveys (available in the appendix) which consisted of questions about their current behaviors, well-being, healthcare experiences, and attitudes regarding the COVID-19 pandemic. Both the January and March surveys also contained short message-based experiments regarding the COVID-19 vaccines which have been published elsewhere.<sup>21,22</sup>

## RUNNING TITLE: COVID-19 VACCINE UPTAKE

Descriptions of all the measures included in the analyses are available at:

<https://rpubs.com/AThorpe/CV19VaxUptakeMeasures>.

*Primary outcome measure.* Self-reported vaccination status in January and March-2021, measured using a single question with three options (0=No; 1=Yes, 1 dose; 2=Yes, 2 doses). As responses 1 and 2 indicated receiving at least one dose of a COVID-19 vaccine, they were considered vaccinated for analyses (0=Not vaccinated; 1=Vaccinated).

*Early vaccine eligibility.* Respondents' age and the total number of comorbidities<sup>23</sup> were included based on recommendation by the Centers for Disease Control and Prevention (CDC) for these populations to be offered vaccines first.<sup>24</sup> As the speed of vaccine distribution within each state may affect vaccine availability for those eligible we also included the proportion of each state that had received at least one dose of a COVID-19 vaccine (retrieved from publicly available data: <https://www.kff.org/coronavirus-covid-19/issue-brief/state-covid-19-data-and-policy-actions/>). Veteran status (0=non-Veteran; 1=Veteran) was also included given the involvement of the U.S. Department of Veterans Affairs in the distribution of COVID-19 vaccines following their authorization.<sup>25</sup>

*Demographic factors.* We included respondents health literacy,<sup>26</sup> numeracy<sup>27,28</sup> and Race/Ethnicity (dummy coded as 0= any other race/ethnicity; 1= non-Hispanic white).

*Psychological factors.* We included respondents' worries and risk perceptions about COVID-19, the Emory Vaccine Confidence Index,<sup>29</sup> perceived importance of Flu and COVID-19 vaccines,

## RUNNING TITLE: COVID-19 VACCINE UPTAKE

COVID-19 vaccine intentions, trust in healthcare,<sup>30</sup> (lack of) belief in science,<sup>31</sup> belief in conspiracy theories,<sup>32</sup> political views, and the single-item maximizer-minimizer elicitation question (the MM1; which measures preference for either waiting or taking action in medical situations where it is unclear whether action is needed).<sup>33</sup>

### **Analysis**

All the analyses were conducted in R Studio Version 1.4.1106.<sup>34</sup> We used the “psych” package<sup>35</sup> to run bivariate correlations between our predictor variables and vaccine uptake. Using the “stats” package,<sup>36</sup> we ran a multiple logistic regression model to test whether the early vaccine eligibility and demographic factors predict getting at least one dose of a COVID-19 vaccination in January-2021. Using a hierarchical approach, we then included the psychological factors to the original model. We then repeated this analytical approach with receiving at least one dose of a COVID-19 vaccine in March-2021 as the dependent variable.

### **Results**

In the regression models which only included the early vaccine eligibility and demographic factors, we found that older age (OR=2.54[95%CI=1.47 – 4.65],  $p=.001$ ), the proportion of the state vaccinated (1.09[1.00–1.19],  $p=.041$ ), increased number of comorbidities (OR=1.17[1.03–1.33],  $p=.034$ ), and higher numeracy (1.59[1.30–1.97],  $p<.001$ ) predicted vaccine uptake in January. Older age (9.10[6.01–14.03],  $p<.001$ ), increased number of comorbidities (1.19[1.04–1.35],  $p=.011$ ), and higher numeracy (1.18[1.01–1.37],  $p=.035$ ) were significant predictors of later vaccine uptake (in March).



## RUNNING TITLE: COVID-19 VACCINE UPTAKE

After including the psychological variables, older age remained a predictor of vaccine uptake in both January and March (Figure 1). Higher numeracy, higher COVID-19 risk perceptions, and believing that it is important for all adults to get the COVID-19 vaccine were also predictors of vaccine uptake in January. In March, believing that it is important for all adults to get the COVID-19 vaccine, prior intentions to get a COVID-19 vaccine, and general belief in science predicted vaccine uptake alongside older age.

In the March-2021 survey, a total of 310 respondents (33% of the total sample) had not received a vaccine. Almost a quarter of those respondents (69 (22%)) reported that they did not want to get one. Among the 69 unvaccinated respondents who did not want to receive a COVID-19 vaccine, concerns about possible side effects and the vaccine development process were the most frequently endorsed reason for not getting vaccinated (Table 1). Other reasons for not getting vaccinated included not believing COVID-19 poses a serious threat, personal beliefs (e.g., religious and philosophical) that conflicted with getting vaccinated, and distrust of the institutions involved with promoting vaccines (e.g., pharmaceutical companies and the government). A few respondents cited doubts about the efficacy of the vaccines and a very small proportion reported access issues (e.g., not having enough time or vaccines being unavailable) as reasons for not getting vaccinated.

In a further exploratory analyses, we found that younger age (0.27[0.09–0.77],  $p=.016$ ), believing it is not important for all adults to get a COVID-19 vaccine (0.15[0.08–0.26],  $p<.001$ ), low trust in healthcare (0.59[0.36–0.95],  $p=.032$ ), and preferring to watch and wait in medical situations where it is not clear whether or not medical action is necessary (0.66[0.48–0.89],

## RUNNING TITLE: COVID-19 VACCINE UPTAKE

$p=.007$ ), were significant predictors of being unvaccinated and not wanting to receive a COVID-19 vaccine by March-2021 (Figure 2).

### **Discussion**

The aim of the present, longitudinal study was to identify key predictors of, and objections to, COVID-19 vaccine uptake. We found that older age, higher numeracy, higher COVID-19 risk perceptions, and positive attitudes towards COVID-19 vaccines were important predictors of early vaccine uptake (by January-2021). As the rollout progressed, the influence of numeracy and risk perceptions remitted and we found that only older age, positive attitudes towards COVID-19 vaccine, and intentions to receive a COVID-19 vaccine were significant predictors of later vaccine uptake (by March-2021).

Older age was the strongest predictor of vaccine uptake for both timepoints, which reflects its emphasis as key criterion for early vaccine eligibility by the CDC.<sup>24</sup> The combination of numeracy, risk perceptions, and attitudes towards COVID-19 vaccines as predictors of early vaccine uptake supports prior research demonstrating that assessment of the risks and benefits offered by vaccination as well as the threat of the disease that the vaccine protects against have a substantial influence on whether or not someone is likely to get vaccinated.<sup>37,38</sup> While clear communication about the risks and benefits associated with the vaccine and the threat posed by the disease is crucial at all times, these findings suggest that it may be particularly effective at encouraging uptake during the early stages of rollouts and for novel vaccines and diseases.

## RUNNING TITLE: COVID-19 VACCINE UPTAKE

Our findings offer important evidence that attitudes and intentions towards COVID-19 predict uptake and provide validation for the many studies that have used these measures as a proxy for vaccination uptake.<sup>2-4,6-9,11,12</sup> In fact, of our respondents who were 65 years or older, only 8% of those who reported that they intended to vaccinate had not done so by the March-2021 survey.

We did not consider respondents younger than 65 years old as recommendations to make COVID-19 vaccines available to all adults aged between 16 and 65 were only announced in March 17, 2021 so it was unlikely they would have had the opportunity to be vaccinated.<sup>39</sup> Taken together, these findings reinforce the need to develop effective strategies for addressing people's concerns and negative attitudes towards COVID-19 vaccines in order to increase uptake.

The findings from the present study may also contribute to informing health communication efforts aimed at those least likely to get a COVID-19 vaccine. Around 10% of the respondents in our study had not been vaccinated at the time of the final survey in March and indicated that they did not intend to do so. These respondents tended to be younger, had negative views about the COVID-19 vaccines for adults, low trust in healthcare, and preferred to watch and wait before taking action in medical situations where there is clinical equipoise on whether action is necessary. In addition, the most important reasons given by these respondents for not getting a COVID-19 vaccine focused on safety concerns (particularly regarding side effects and the development process), beliefs that COVID-19 is not a serious threat, personal beliefs conflicting with vaccination and distrust of institutions involved with the vaccines. Our findings are aligned with prior studies on the reasons given by people who are hesitant towards or refuse COVID-19 vaccines,<sup>3,40-42</sup> and offer an empirical basis for targeting public health messages to those who are least likely to vaccinate and tailoring messages to address their concerns. As these beliefs are

## RUNNING TITLE: COVID-19 VACCINE UPTAKE

often deeply held and traditional models of health communication have been largely ineffective at addressing them,<sup>21,43</sup> we encourage health researchers and communicators to move beyond such traditional models of information provision and instead generate alternative strategies for addressing the concerns of those who are reluctant to get vaccinated.

One limitation of the study is that the findings rely on the accuracy and consistency of respondents' self-reported data over the duration of the survey period. Although self-reports have been shown to be highly concordant with healthcare utilization and vaccine records,<sup>44,45</sup> replication of these findings with a method for confirming respondents' reported vaccine uptake would increase confidence in these findings.

Furthermore, our sample consisted of Veteran and non-Veteran respondents who were unique in being sufficiently motivated and able to complete three online surveys during the pandemic and therefore are not representative of the general U.S. population. The finding that Veteran status did not predict vaccine uptake at either time point was surprising given the efforts and widespread outreach of the U.S. Department of Veterans Affairs in supporting COVID-19 vaccine distribution.<sup>46</sup> However, it is likely that the greater proportion of older adults in the Veteran sample compared to the non-Veteran sample may have limited our ability to observe a significant effect of Veteran status in the full model. In addition, our sample was overrepresented by respondents without many health conditions (70% reported  $\leq 1$  health condition), with high health literacy (94% of respondents reported high health literacy), and who identified as non-Hispanic White (78%). The unique makeup of our sample may also explain

## RUNNING TITLE: COVID-19 VACCINE UPTAKE

why older age and numeracy were the only early eligibility and demographic factors associated with vaccine uptake.

Despite these limitations, the findings from the present study offer important insights regarding the predictors of vaccine uptake during the early stages of the COVID-19 vaccine rollout in the US, which can help guide health communications and public outreach. Our findings reinforce the need for developing effective strategies for promoting positive attitudes and intentions towards vaccines to promote uptake. A major strength of our study is that we were able to cover the initial stages of the COVID-19 vaccine distribution. However, given the changes observed between January and March and the unique characteristics of our sample, further studies are needed to re-evaluate the key predictors of vaccine uptake as the rollout progresses and with wider representation.

## RUNNING TITLE: COVID-19 VACCINE UPTAKE

### References

1. Bartsch SM, O'Shea KJ, Ferguson MC, et al. Vaccine Efficacy Needed for a COVID-19 Coronavirus Vaccine to Prevent or Stop an Epidemic as the Sole Intervention. *American Journal of Preventive Medicine*. 2020;59(4):493-503. doi:10.1016/j.amepre.2020.06.011
2. Daly M, Robinson E. Willingness to Vaccinate Against COVID-19 in the U.S.: Representative Longitudinal Evidence From April to October 2020. *American Journal of Preventive Medicine*. 2021;60(6):766-773. doi:10.1016/j.amepre.2021.01.008
3. Callaghan T, Moghtaderi A, Lueck JA, et al. Correlates and disparities of intention to vaccinate against COVID-19. *Social Science & Medicine*. 2021;272:113638. doi:10.1016/j.socscimed.2020.113638
4. Kelly BJ, Southwell BG, McCormack LA, et al. Predictors of willingness to get a COVID-19 vaccine in the U.S. *BMC Infect Dis*. 2021;21(1):1-7. doi:10.1186/s12879-021-06023-9
5. Kerr JR, Schneider CR, Recchia G, et al. Predictors of COVID-19 vaccine acceptance across time and countries. *medRxiv*. Published online December 11, 2020:2020.12.09.20246439. doi:10.1101/2020.12.09.20246439
6. Viswanath K, Bekalu M, Dhawan D, Pinnamaneni R, Lang J, McLoud R. Individual and social determinants of COVID-19 vaccine uptake. *BMC Public Health*. 2021;21(1):818. doi:10.1186/s12889-021-10862-1
7. Ruiz JB, Bell RA. Predictors of intention to vaccinate against COVID-19: Results of a nationwide survey. *Vaccine*. 2021;39(7):1080-1086. doi:10.1016/j.vaccine.2021.01.010
8. Allington D, McAndrew S, Moxham-Hall V, Duffy B. Coronavirus conspiracy suspicions, general vaccine attitudes, trust and coronavirus information source as predictors of vaccine hesitancy among UK residents during the COVID-19 pandemic. *Psychological Medicine*. Published online undefined/ed:1-12. doi:10.1017/S0033291721001434
9. Fridman A, Gershon R, Gneezy A. COVID-19 and vaccine hesitancy: A longitudinal study. *PLOS ONE*. 2021;16(4):e0250123. doi:10.1371/journal.pone.0250123
10. Loomba S, de Figueiredo A, Piatek SJ, de Graaf K, Larson HJ. Measuring the impact of COVID-19 vaccine misinformation on vaccination intent in the UK and USA. *Nat Hum Behav*. 2021;5(3):337-348. doi:10.1038/s41562-021-01056-1
11. Lindholt MF, Jørgensen F, Bor A, Petersen MB. Public acceptance of COVID-19 vaccines: cross-national evidence on levels and individual-level predictors using observational data. *BMJ Open*. 2021;11(6):e048172. doi:10.1136/bmjopen-2020-048172
12. Momplaisir F, Haynes N, Nkwihoreze H, Nelson M, Werner RM, Jemmott J. Understanding Drivers of Coronavirus Disease 2019 Vaccine Hesitancy Among Blacks. *Clinical Infectious Diseases*. 2021;(ciab102). doi:10.1093/cid/ciab102

RUNNING TITLE: COVID-19 VACCINE UPTAKE

13. Gerend MA, Shepherd JE. Predicting Human Papillomavirus Vaccine Uptake in Young Adult Women: Comparing the Health Belief Model and Theory of Planned Behavior. *Annals of Behavioral Medicine*. 2012;44(2):171-180. doi:10.1007/s12160-012-9366-5
14. Schmid P, Rauber D, Betsch C, Lidolt G, Denker ML. Barriers of Influenza Vaccination Intention and Behavior – A Systematic Review of Influenza Vaccine Hesitancy, 2005 – 2016. *PLOS ONE*. 2017;12(1):e0170550. doi:10.1371/journal.pone.0170550
15. Figueiredo A de, Simas C, Karafillakis E, Paterson P, Larson HJ. Mapping global trends in vaccine confidence and investigating barriers to vaccine uptake: a large-scale retrospective temporal modelling study. *The Lancet*. 2020;396(10255):898-908. doi:10.1016/S0140-6736(20)31558-0
16. Harris KM, Maurer J, Lurie N. Do People Who Intend to Get a Flu Shot Actually Get One? *J GEN INTERN MED*. 2009;24(12):1311. doi:10.1007/s11606-009-1126-2
17. Ye L, Fang T, Cui J, et al. The intentions to get vaccinated against influenza and actual vaccine uptake among diabetic patients in Ningbo, China: identifying motivators and barriers. *Human Vaccines & Immunotherapeutics*. 2021;17(1):106-118. doi:10.1080/21645515.2020.1761201
18. Maurer J. Inspecting the Mechanism: A Longitudinal Analysis of Socioeconomic Status Differences in Perceived Influenza Risks, Vaccination Intentions, and Vaccination Behaviors during the 2009–2010 Influenza Pandemic. *Med Decis Making*. 2016;36(7):887-899. doi:10.1177/0272989X15608379
19. Galarce EM, Minsky S, Viswanath K. Socioeconomic status, demographics, beliefs and A(H1N1) vaccine uptake in the United States. *Vaccine*. 2011;29(32):5284-5289. doi:10.1016/j.vaccine.2011.05.014
20. McEachan RRC, Conner M, Taylor NJ, Lawton RJ. Prospective prediction of health-related behaviours with the theory of planned behaviour: A meta-analysis. *Health psychology review*. 2011;5(2):97-144.
21. Thorpe A, Fagerlin A, Butler J, et al. Communicating about COVID-19 vaccine development and safety. *medRxiv*. Published online July 2, 2021:2021.06.25.21259519. doi:10.1101/2021.06.25.21259519
22. Thorpe A, Fagerlin A, Drews FA, et al. Communications to Promote Interest and Confidence in COVID-19 Vaccines: *American Journal of Health Promotion*. Published online April 12, 2022. doi:10.1177/08901171221082904
23. Charlson ME, Pompei P, Ales KL, MacKenzie CR. A new method of classifying prognostic comorbidity in longitudinal studies: Development and validation. *Journal of Chronic Diseases*. 1987;40(5):373-383. doi:10.1016/0021-9681(87)90171-8

RUNNING TITLE: COVID-19 VACCINE UPTAKE

24. Dooling K. The Advisory Committee on Immunization Practices' Updated Interim Recommendation for Allocation of COVID-19 Vaccine — United States, December 2020. *MMWR Morb Mortal Wkly Rep.* 2021;69. doi:10.15585/mmwr.mm695152e2
25. Office of Public and Intergovernmental Affairs. VA announces initial plans for COVID-19 vaccine distribution. Accessed December 2, 2021. <https://www.va.gov/opa/pressrel/pressrelease.cfm?id=5580>
26. Morris NS, MacLean CD, Chew LD, Littenberg B. The Single Item Literacy Screener: Evaluation of a brief instrument to identify limited reading ability. *BMC Family Practice.* 2006;7(1):21. doi:10.1186/1471-2296-7-21
27. McNaughton CD, Cavanaugh KL, Kripalani S, Rothman RL, Wallston KA. Validation of a Short, 3-Item Version of the Subjective Numeracy Scale. *Med Decis Making.* 2015;35(8):932-936. doi:10.1177/0272989X15581800
28. Fagerlin A, Zikmund-Fisher BJ, Ubel PA, Jankovic A, Derry HA, Smith DM. Measuring numeracy without a math test: development of the Subjective Numeracy Scale. *Medical Decision Making.* 2007;27(5):672-680. doi:10.1177/0272989X07304449
29. Frew PM, Murden R, Mehta CC, et al. Development of a US trust measure to assess and monitor parental confidence in the vaccine system. *Vaccine.* 2019;37(2):325-332. doi:10.1016/j.vaccine.2018.09.043
30. Shea JA, Micco E, Dean LT, McMurphy S, Schwartz JS, Armstrong K. Development of a Revised Health Care System Distrust Scale. *J Gen Intern Med.* 2008;23(6):727-732. doi:10.1007/s11606-008-0575-3
31. Hartman RO, Dieckmann NF, Sprenger AM, Stastny BJ, DeMarree KG. Modeling attitudes toward science: development and validation of the credibility of science scale. *Basic and Applied Social Psychology.* 2017;39(6):358-371. doi:10.1080/01973533.2017.1372284
32. Piltch-Loeb R, Zikmund-Fisher BJ, Shaffer VA, et al. Cross-Sectional Psychological and Demographic Associations of Zika Knowledge and Conspiracy Beliefs Before and After Local Zika Transmission. *Risk Analysis.* 2019;39(12):2683-2693. doi:10.1111/risa.13369
33. Scherer LD, Zikmund-Fisher BJ. Eliciting medical maximizing-minimizing preferences with a single question: development and validation of the MM1. *Medical Decision Making.* 2020;40(4):545-550. doi:10.1177/0272989X20927700
34. RStudio Team. *RStudio: Integrated Development Environment for R.* RStudio. PBC, Boston, MA; 2021. <http://www.rstudio.com/>.
35. Revelle W. *Psych: Procedures for Psychological, Psychometric, and Personality Research.* Northwestern University; 2021. <https://CRAN.R-project.org/package=psych>
36. R Core Team. *R: A Language and Environment for Statistical Computing.* R Foundation for Statistical Computing; 2020. <https://www.R-project.org/>



RUNNING TITLE: COVID-19 VACCINE UPTAKE

37. Betsch C, Schmid P, Heinemeier D, Korn L, Holtmann C, Böhm R. Beyond confidence: Development of a measure assessing the 5C psychological antecedents of vaccination. *PLOS ONE*. 2018;13(12):e0208601. doi:10.1371/journal.pone.0208601
38. Karafillakis E, Larson HJ. The benefit of the doubt or doubts over benefits? A systematic literature review of perceived risks of vaccines in European populations. *Vaccine*. 2017;35(37):4840-4850. doi:10.1016/j.vaccine.2017.07.061
39. Affairs (ASPA) AS for P. COVID-19 Vaccine Distribution: The Process. HHS.gov. Published December 16, 2020. Accessed December 2, 2021. <https://www.hhs.gov/coronavirus/covid-19-vaccines/distribution/index.html>
40. Dror AA, Eisenbach N, Taiber S, et al. Vaccine hesitancy: the next challenge in the fight against COVID-19. *Eur J Epidemiol*. 2020;35(8):775-779. doi:10.1007/s10654-020-00671-y
41. Fisher KA, Bloomstone SJ, Walder J, Crawford S, Fouayzi H, Mazor KM. Attitudes Toward a Potential SARS-CoV-2 Vaccine: A Survey of U.S. Adults. *Ann Intern Med*. 2020;173(12):964-973. doi:10.7326/M20-3569
42. Paul E, Steptoe A, Fancourt D. Attitudes towards vaccines and intention to vaccinate against COVID-19: Implications for public health communications. *The Lancet Regional Health – Europe*. 2021;1. doi:10.1016/j.lanep.2020.100012
43. Freeman D, Loe BS, Yu LM, et al. Effects of different types of written vaccination information on COVID-19 vaccine hesitancy in the UK (OCEANS-III): a single-blind, parallel-group, randomised controlled trial. *The Lancet Public Health*. 2021;6(6):e416-e427. doi:10.1016/S2468-2667(21)00096-7
44. Ritter PL, Stewart AL, Kaymaz H, Sobel DS, Block DA, Lorig KR. Self-reports of health care utilization compared to provider records. *Journal of Clinical Epidemiology*. 2001;54(2):136-141. doi:10.1016/S0895-4356(00)00261-4
45. King JP, McLean HQ, Belongia EA. Validation of self-reported influenza vaccination in the current and prior season. *Influenza and other respiratory viruses*. 2018;12(6):808-813.
46. COVID-19 Vaccines At VA | Veterans Affairs. Accessed July 25, 2021. <https://www.va.gov/health-care/covid-19-vaccine/>

RUNNING TITLE: COVID-19 VACCINE UPTAKE

**Table 1. Respondent demographics overall and according to Veteran status.**

|                                                     | Overall<br>(n=930) | Veteran<br>(n=584) | Non-Veteran<br>(n=346) |
|-----------------------------------------------------|--------------------|--------------------|------------------------|
| <b>Age — yr</b>                                     |                    |                    |                        |
| 18 to 34                                            | 37 (4%)            | 0 (0%)             | 37 (11%)               |
| 35 to 54                                            | 87 (9%)            | 16 (3%)            | 71 (21%)               |
| 55 to 74                                            | 591 (64%)          | 390 (67%)          | 201 (58%)              |
| 75 or older                                         | 213 (23%)          | 176 (30%)          | 37 (10%)               |
| Did not respond                                     | 2 (<1%)            | 2 (<1%)            | 0 (0%)                 |
| <b>Gender</b>                                       |                    |                    |                        |
| Female                                              | 193 (21%)          | 38 (7%)            | 155 (45%)              |
| Male                                                | 735 (79%)          | 545 (93%)          | 190 (55%)              |
| Non-binary/Third gender or Transgender man/Transman | 1 (<1%)            | 1 (<1%)            | 0 (0%)                 |
| <b>Race/Ethnicity</b>                               |                    |                    |                        |
| Non-Hispanic White                                  | 720 (77%)          | 447 (77%)          | 273 (79%)              |
| Non-Hispanic Black                                  | 63 (7%)            | 44 (8%)            | 20 (6%)                |
| Hispanic                                            | 92 (10%)           | 61 (10%)           | 31 (9%)                |
| Asian/Asian American                                | 26 (3%)            | 9 (2%)             | 17 (5%)                |
| American Indian/Alaskan Native                      | 4 (<1%)            | 4 (1%)             | 0 (0%)                 |
| Native Hawaiian/Other Pacific Islander              | 2 (<1%)            | 2 (<1%)            | 0 (0%)                 |
| Another race                                        | 14 (2%)            | 11 (2%)            | 3 (1%)                 |
| Multiracial                                         | 8 (1%)             | 6 (1%)             | 2 (1%)                 |
| <b>Income</b>                                       |                    |                    |                        |
| \$0 - \$49k                                         | 206 (22%)          | 117 (20%)          | 89 (26%)               |
| \$50K to \$99K                                      | 362 (39%)          | 232 (40%)          | 130 (38%)              |
| \$100K or more                                      | 325 (35%)          | 216 (37%)          | 109 (32%)              |
| Prefer not to say                                   | 37 (4%)            | 19 (3%)            | 18 (5%)                |
| <b>Residence</b>                                    |                    |                    |                        |
| Rural                                               | 151 (16%)          | 96 (16%)           | 55 (16%)               |
| Small city (<100,000)                               | 159 (17%)          | 101 (17%)          | 58 (17%)               |
| Suburban, near a large city                         | 457 (49%)          | 277 (47%)          | 180 (52%)              |
| Mid-sized city (100,000-1million)                   | 90 (10%)           | 60 (10%)           | 30 (9%)                |
| large city (>1million)                              | 70 (8%)            | 47 (8%)            | 23 (7%)                |
| Other                                               | 3 (<1%)            | 3 (1%)             | 0 (0%)                 |
| <b>Vaccination status – January 2021</b>            |                    |                    |                        |
| None                                                | 765 (82%)          | 463 (79%)          | 302 (87%)              |
| One dose                                            | 160 (17%)          | 118 (20%)          | 42 (12%)               |
| Two doses                                           | 5 (1%)             | 3 (1%)             | 2 (1%)                 |
| <b>Vaccination status – March 2021</b>              |                    |                    |                        |
| None (March)                                        | 310 (33%)          | 146 (25%)          | 164 (47%)              |
| One dose (March)                                    | 206 (22%)          | 128 (22%)          | 78 (23%)               |
| Two doses (March)                                   | 414 (45%)          | 310 (53%)          | 104 (30%)              |

RUNNING TITLE: COVID-19 VACCINE UPTAKE

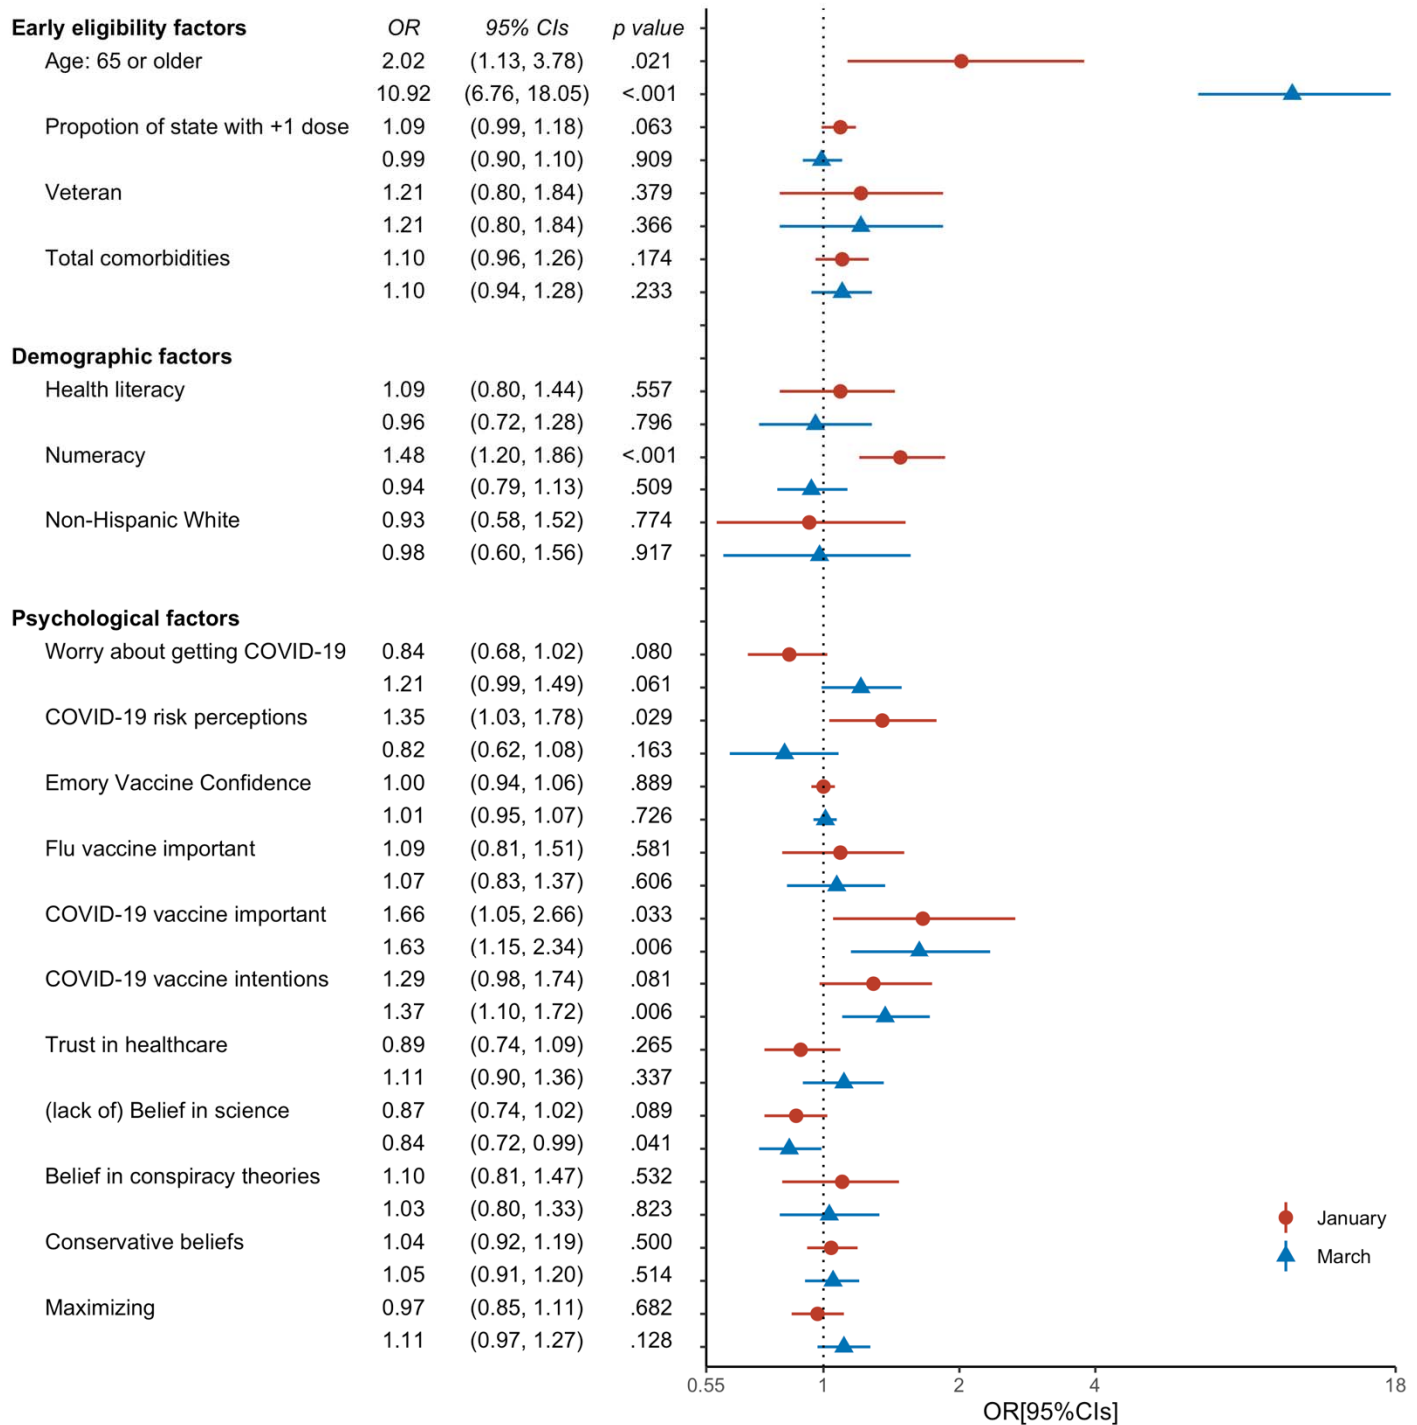

Figure 1. Odds ratios with 95% confidence intervals for predictors of respondents' vaccination status in both January and March 2021. Reference categories were 64 or younger (for Age), non-Veteran (for Veteran), and any other Race/Ethnicity (for Non-Hispanic White).

RUNNING TITLE: COVID-19 VACCINE UPTAKE

**Table 2. Bivariate correlations and odds ratios for predictor variables and COVID-19 vaccine uptake in January and March of 2021.**

|                                  | COVID-19 vaccine uptake (≥1 dose),<br>January-2021 |                  |                   |                | COVID-19 vaccine uptake (≥1 dose),<br>March-2021 |                  |                     |                |
|----------------------------------|----------------------------------------------------|------------------|-------------------|----------------|--------------------------------------------------|------------------|---------------------|----------------|
|                                  | <i>r</i>                                           | <i>P value</i> * | OR                | <i>P value</i> | <i>r</i>                                         | <i>P value</i> * | OR                  | <i>P value</i> |
| Age                              | 0.16 (0.10, 0.22)                                  | <.001            | 2.02 (1.13, 3.78) | .021           | 0.50 (0.45, 0.55)                                | <.001            | 10.92 (6.76, 18.05) | <.001          |
| Proportion of state with +1 dose | 0.07 (0.00, 0.13)                                  | .239             | 1.09 (0.99, 1.18) | .063           | 0.08 (0.01, 0.15)                                | .070             | 0.99 (0.90, 1.10)   | .909           |
| Veteran                          | 0.10 (0.04, 0.16)                                  | .034             | 1.21 (0.80, 1.84) | .379           | 0.22 (0.15, 0.29)                                | <.001            | 1.21 (0.80, 1.84)   | .366           |
| Total comorbidities              | 0.09 (0.03, 0.16)                                  | .018             | 1.10 (0.96, 1.26) | .174           | 0.17 (0.10, 0.24)                                | <.001            | 1.10 (0.94, 1.28)   | .233           |
| Health literacy                  | -0.02 (-0.09, 0.04)                                | .948             | 1.09 (0.80, 1.44) | .557           | -0.08 (-0.15, -0.01)                             | .060             | 0.96 (0.72, 1.28)   | .796           |
| Numeracy                         | 0.17 (0.10, 0.23)                                  | <.001            | 1.48 (1.20, 1.86) | <.001          | 0.18 (0.11, 0.25)                                | <.001            | 0.94 (0.79, 1.13)   | .509           |
| Non-Hispanic White               | 0.04 (-0.02, 0.11)                                 | .797             | 0.93 (0.58, 1.52) | .774           | 0.12 (0.05, 0.19)                                | <.001            | 0.98 (0.60, 1.56)   | .917           |
| Worry about getting COVID-19     | 0.04 (-0.02, 0.10)                                 | .797             | 0.84 (0.68, 1.02) | .080           | 0.12 (0.05, 0.19)                                | <.001            | 1.21 (0.99, 1.49)   | .061           |
| COVID-19 risk perceptions        | 0.11 (0.05, 0.17)                                  | .008             | 1.35 (1.03, 1.78) | .029           | 0.13 (0.06, 0.20)                                | <.001            | 0.82 (0.62, 1.08)   | .163           |
| Emory Vaccine Confidence         | 0.15 (0.08, 0.21)                                  | <.001            | 1.00 (0.94, 1.06) | .889           | 0.34 (0.28, 0.40)                                | <.001            | 1.01 (0.95, 1.07)   | .726           |
| Flu vaccine important            | 0.18 (0.12, 0.24)                                  | <.001            | 1.09 (0.81, 1.51) | .581           | 0.37 (0.31, 0.43)                                | <.001            | 1.07 (0.83, 1.37)   | .606           |
| COVID-19 vaccine important       | 0.20 (0.14, 0.27)                                  | <.001            | 1.66 (1.05, 2.66) | .033           | 0.43 (0.37, 0.49)                                | <.001            | 1.63 (1.15, 2.34)   | .006           |
| COVID-19 vaccine intentions      | 0.20 (0.14, 0.26)                                  | <.001            | 1.29 (0.98, 1.74) | .081           | 0.42 (0.36, 0.48)                                | <.001            | 1.37 (1.10, 1.72)   | .006           |
| Trust in healthcare              | 0.08 (0.01, 0.14)                                  | .135             | 0.89 (0.74, 1.09) | .265           | 0.25 (0.18, 0.32)                                | <.001            | 1.11 (0.90, 1.36)   | .337           |
| (lack of) Belief in science      | -0.15 (-0.21, -0.08)                               | <.001            | 0.87 (0.74, 1.02) | .089           | -0.25 (-0.31, -0.18)                             | <.001            | 0.84 (0.72, 0.99)   | .041           |
| Belief in conspiracy theories    | -0.11 (-0.17, -0.05)                               | .008             | 1.10 (0.81, 1.47) | .532           | -0.25 (-0.32, -0.19)                             | <.001            | 1.03 (0.80, 1.33)   | .823           |
| Conservative beliefs             | -0.02 (-0.09, 0.04)                                | .948             | 1.04 (0.92, 1.19) | .500           | -0.02 (-0.09, 0.05)                              | .610             | 1.05 (0.91, 1.20)   | .514           |
| Maximizing                       | 0.05 (-0.01, 0.12)                                 | .473             | 0.97 (0.85, 1.11) | .682           | 0.14 (0.07, 0.21)                                | <.001            | 1.11 (0.97, 1.27)   | .128           |

*r* represents the bivariate correlation coefficient, OR represents the odds ratio.

95% confidence intervals (CIs) are shown in parentheses.

\*Holm-Bonferroni correction applied.

RUNNING TITLE: COVID-19 VACCINE UPTAKE

**Table 3. Reasons for not getting a COVID-19 vaccine**

|                                                      | <i>Unvaccinated respondents who were not interested in getting a COVID-19 vaccine</i> |                         |                       | <i>All respondents from wave 1 and all unvaccinated respondents in waves 2 and 3</i> |                           |                        |
|------------------------------------------------------|---------------------------------------------------------------------------------------|-------------------------|-----------------------|--------------------------------------------------------------------------------------|---------------------------|------------------------|
|                                                      | December, 2020<br>(N=69)                                                              | January, 2021<br>(N=69) | March, 2021<br>(N=69) | December, 2020<br>(N=2085)                                                           | January, 2021<br>(N=1043) | March, 2021<br>(N=361) |
| <b>Safety – no. (%)</b>                              |                                                                                       |                         |                       |                                                                                      |                           |                        |
| Concerns about side effects                          | 22 (32)                                                                               | 14 (20)                 | 20 (29)               | 686 (33)                                                                             | 159 (15)                  | 65 (18)                |
| Concerns about vaccine development process           | 5 (7)                                                                                 | 16 (23)                 | 13 (19)               | 235 (11)                                                                             | 76 (7)                    | 27 (8)                 |
| Worried about getting COVID-19 from the vaccines     | 3 (4)                                                                                 | 2 (3)                   | 2 (3)                 | 74 (5)                                                                               | 16 (2)                    | 7 (2)                  |
| I don't like needles                                 | 4 (6)                                                                                 | 1 (1)                   | 2 (3)                 | 83 (4)                                                                               | 12 (1)                    | 11 (3)                 |
| <b>Efficacy – no. (%)</b>                            |                                                                                       |                         |                       |                                                                                      |                           |                        |
| Doubt vaccine efficacy                               | 4 (6)                                                                                 | 7 (10)                  | 4 (6)                 | 98 (5)                                                                               | 19 (2)                    | 7 (2)                  |
| <b>Low COVID-19 threat – no. (%)</b>                 |                                                                                       |                         |                       |                                                                                      |                           |                        |
| I won't get COVID-19 even if I don't get the vaccine | 4 (6)                                                                                 | 5 (7)                   | 5 (7)                 | 63 (3)                                                                               | 12 (1)                    | 14 (4)                 |
| COVID-19 is not as serious as some people say        | 6 (9)                                                                                 | 3 (4)                   | 6 (9)                 | 40 (2)                                                                               | 12 (1)                    | 11 (3)                 |
| I do not think I'll get very sick if I get COVID-19  | 1 (1)                                                                                 | 3 (4)                   | 1 (1)                 | 55 (3)                                                                               | 8 (.8)                    | 8 (2)                  |
| <b>Personal beliefs – no. (%)</b>                    |                                                                                       |                         |                       |                                                                                      |                           |                        |
| Against religious/philosophical beliefs              | 6 (9)                                                                                 | 3 (4)                   | 4 (6)                 | 34 (2)                                                                               | 7 (.7)                    | 10 (3)                 |
| Distrust of big Pharma/government                    | 5 (7)                                                                                 | 5 (7)                   | 4 (6)                 | 97 (5)                                                                               | 21 (2)                    | 16 (4)                 |
| <b>Other reasons – no. (%)</b>                       |                                                                                       |                         |                       |                                                                                      |                           |                        |
| Already had COVID-19                                 | 1 (1)                                                                                 | 3 (4)                   | 2 (3)                 | 28 (1)                                                                               | 15 (1)                    | 5 (1)                  |
| No specific reason/multiple reasons/Unsure           | 1 (1)                                                                                 | -                       | 3 (4)                 | 13 (.6)                                                                              | 7 (.7)                    | 5 (1)                  |
| Did not respond                                      | 5 (7)                                                                                 | 5 (7)                   | -                     | 185 (9)                                                                              | 69 (7)                    | 1 (.3)                 |
| I plan to get the vaccine                            | -                                                                                     | 1 (1)                   | 1 (1)                 | 309 (15)                                                                             | 599 (57)                  | 166 (46)               |
| Access/Availability/Cost                             | -                                                                                     | 1 (1)                   | -                     | 36 (2)                                                                               | 5 (.5)                    | 2 (.6)                 |
| Medical reasons (e.g., allergies)                    | 2 (3)                                                                                 | -                       | 2 (3)                 | 49 (2)                                                                               | 6 (.6)                    | 6 (2)                  |

medRxiv preprint doi: <https://doi.org/10.1101/2022.04.19.22273818>; this version posted April 19, 2022. The copyright holder for this preprint (which was not certified by peer review) is the author/funder, who has granted medRxiv a license to display the preprint in perpetuity. This article is a US Government work. It is not subject to copyright under 17 USC 105 and is also made available for use under a CC0 license.

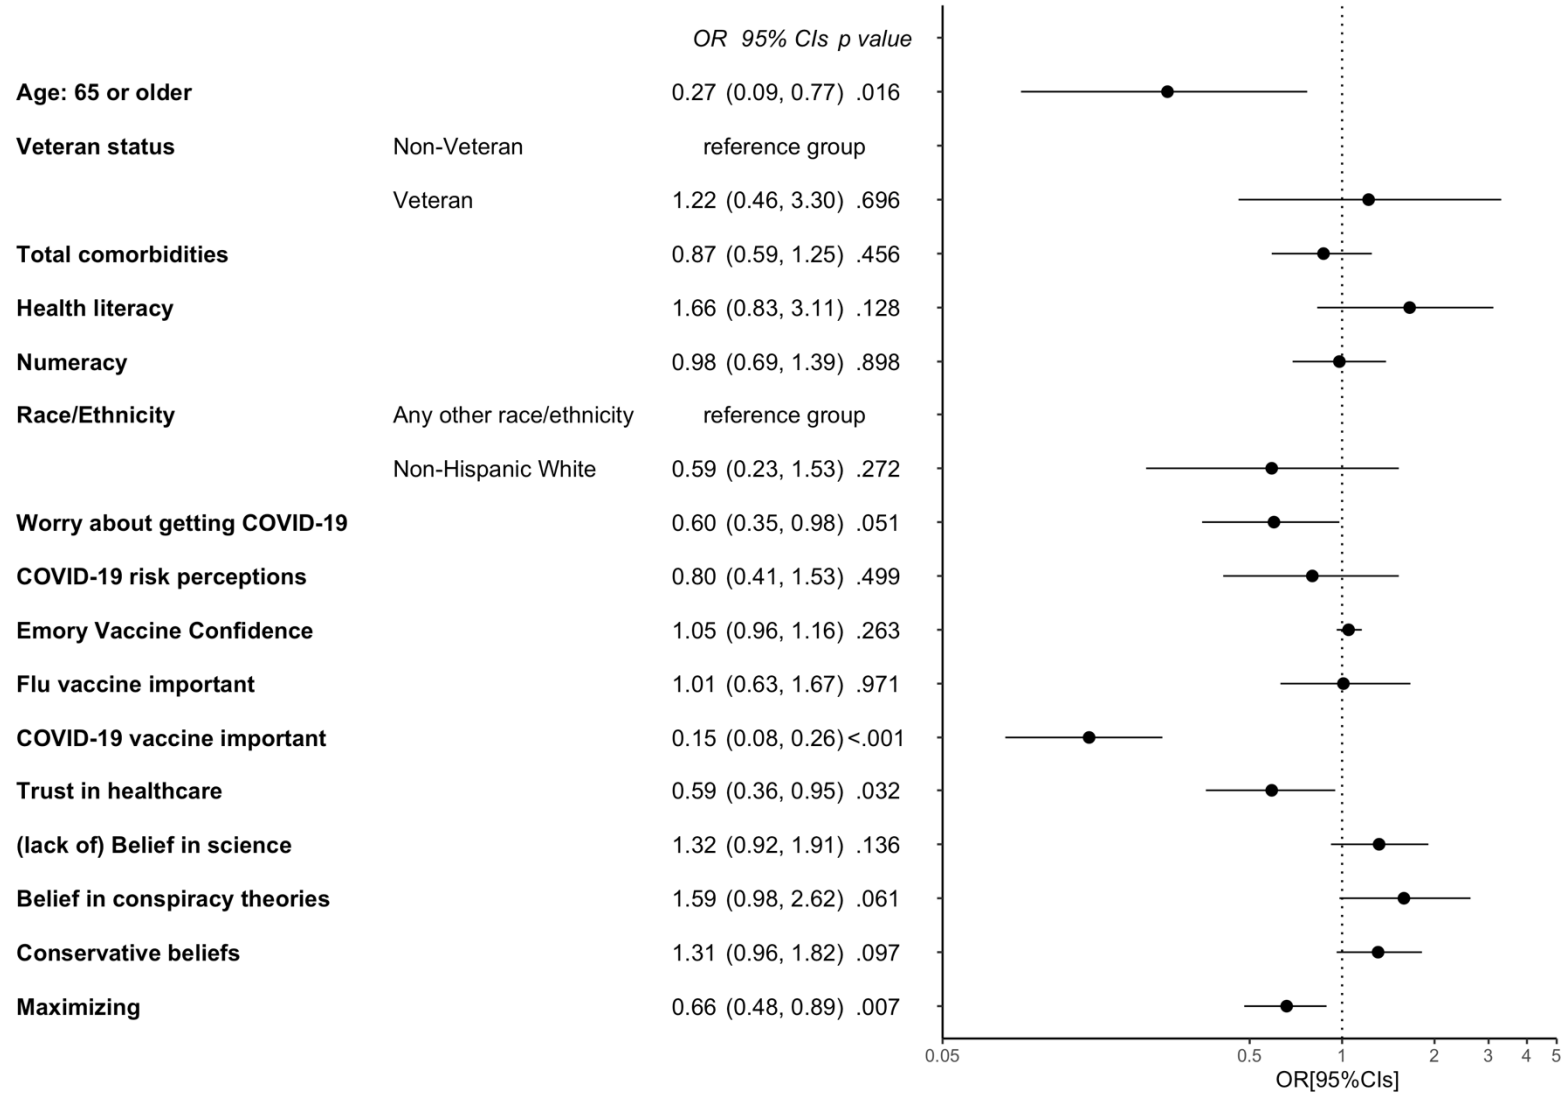

Figure 2. Odds ratios with 95% confidence intervals for predictors of being unvaccinated and not wanting a COVID-19 vaccine by March 2021.
